# Supplementary material for: Aptamer-Based High-Throughput Screening Model for Efficient Selection and Evaluation of Natural Ingredients against SGIV Infection
Source: MDPI journal article supplement (doi:10.3390/v14061242), 2022-06-08
Supplement: s1 [file s1]

**Table S1.** The properties of natural ingredients from medicinal plants.

| Number | Name                                                | Origin                              | Safe concentrations          |
|--------|-----------------------------------------------------|-------------------------------------|------------------------------|
| 1.     | <i>Green tea</i> aqueous extract                    | Green tea                           | $\leq 100 \mu\text{g/mL}$    |
| 2.     | (-)-Epigallocatechin                                | Green tea                           | $\leq 50 \mu\text{g/mL}$     |
| 3.     | (-)-Epicatechin                                     | Green tea                           | $\leq 20 \mu\text{g/mL}$     |
| 4.     | Tea Polyphenol                                      | Green tea                           | $\leq 10 \mu\text{g/mL}$     |
| 5.     | (-)-Epigallocatechin gallate                        | Green tea                           | $\leq 10 \mu\text{g/mL}$     |
| 6.     | (-)-Epicatechin gallate                             | Green tea                           | $\leq 10 \mu\text{g/mL}$     |
| 7.     | <i>Illicium verum</i> aqueous extract               | <i>Illicium verum</i> Hook. f.      | $\leq 500 \mu\text{g/mL}$    |
| 8.     | Shikimic acid                                       | <i>Illicium verum</i> Hook. f.      | $\leq 250 \mu\text{g/mL}$    |
| 9.     | 3,4-dihydroxybenzoate acid                          | <i>Illicium verum</i> Hook. f.      | $\leq 400 \mu\text{g/mL}$    |
| 10.    | quercetin                                           | <i>Illicium verum</i> Hook. f.      | $\leq 50 \mu\text{g/mL}$     |
| 11.    | <i>Areca catechu</i> aqueous extract                | <i>Areca catechu</i> L.             | $\leq 31.25 \mu\text{g/mL}$  |
| 12.    | Arecoline hydrobromide                              | <i>Areca catechu</i> L.             | $\leq 125 \mu\text{g/mL}$    |
| 13.    | <i>Agrimonia pilosa</i> aqueous extract             | <i>Agrimonia pilosa</i>             | $\leq 156.25 \mu\text{g/mL}$ |
| 14.    | <i>Mulberry Leaves</i> aqueous extract              | <i>Mulberry Leaves</i>              | $\leq 500 \mu\text{g/mL}$    |
| 15.    | Isoquercitrin                                       | <i>Mulberry Leaves</i>              | $\leq 1000 \mu\text{g/mL}$   |
| 16.    | Morin                                               | <i>Mulberry Leaves</i>              | $\leq 100 \mu\text{g/mL}$    |
| 17.    | $\beta$ -sitosterol                                 | <i>Mulberry Leaves</i>              | $\leq 12.5 \mu\text{g/mL}$   |
| 18.    | Trihydroxyethylrutin                                | <i>Mulberry Leaves</i>              | $\leq 125 \mu\text{g/mL}$    |
| 19.    | <i>Magnoliae Officinalis Cortex</i> aqueous extract | <i>Magnoliae Officinalis Cortex</i> | $\leq 500 \mu\text{g/mL}$    |
| 20.    | Apigenin                                            | <i>Viola yedoensis</i>              | $\leq 1.25 \mu\text{g/mL}$   |
